# Supplementary material
Source: PubMed Central journal article supplement (PMC8491021)
Supplement: kiab240_supplementary_data.pdf [file kiab240_supplementary_data.pdf]

**Supplemental Data for "Natural diversity provides a broad spectrum of cyanobacteriochrome-based diguanylyl cyclases"**

**Matthew Blain-Hartung, Nathan C. Rockwell, J. Clark Lagarias**

**Department of Molecular and Cellular Biology, University of California, Davis, CA 95616,  
USA**

\*Corresponding Author: Tel: 530-752-1865; email: [jclagarias@ucdavis.edu](mailto:jclagarias@ucdavis.edu)

*Five figures, one table and one citation.*

**Supplemental Figure S1. Spectral analysis of selected fusion CBCR-DGC proteins.** Absorbance spectra of: (A) NpR6012g4-GGDEF(1), (B) NpR6012g4-GGDEF(2), (C) NpR6012g4-GGDEF(3), (D) NpR6012g4-GGDEF(4), (E) NpR6012g4-GGDEF(5), (F) RcaE-GGDEF(1), (G) RcaE-GGDEF(2), (H) RcaE-GGDEF(3), (I) RcaE-GGDEF(4) (J) DGC enzyme assay data; values ( $\pm$  SD,  $n = 3$ ) are shown. For all panels, *15Z* = blue trace/bar, *15E* = orange trace/bar).

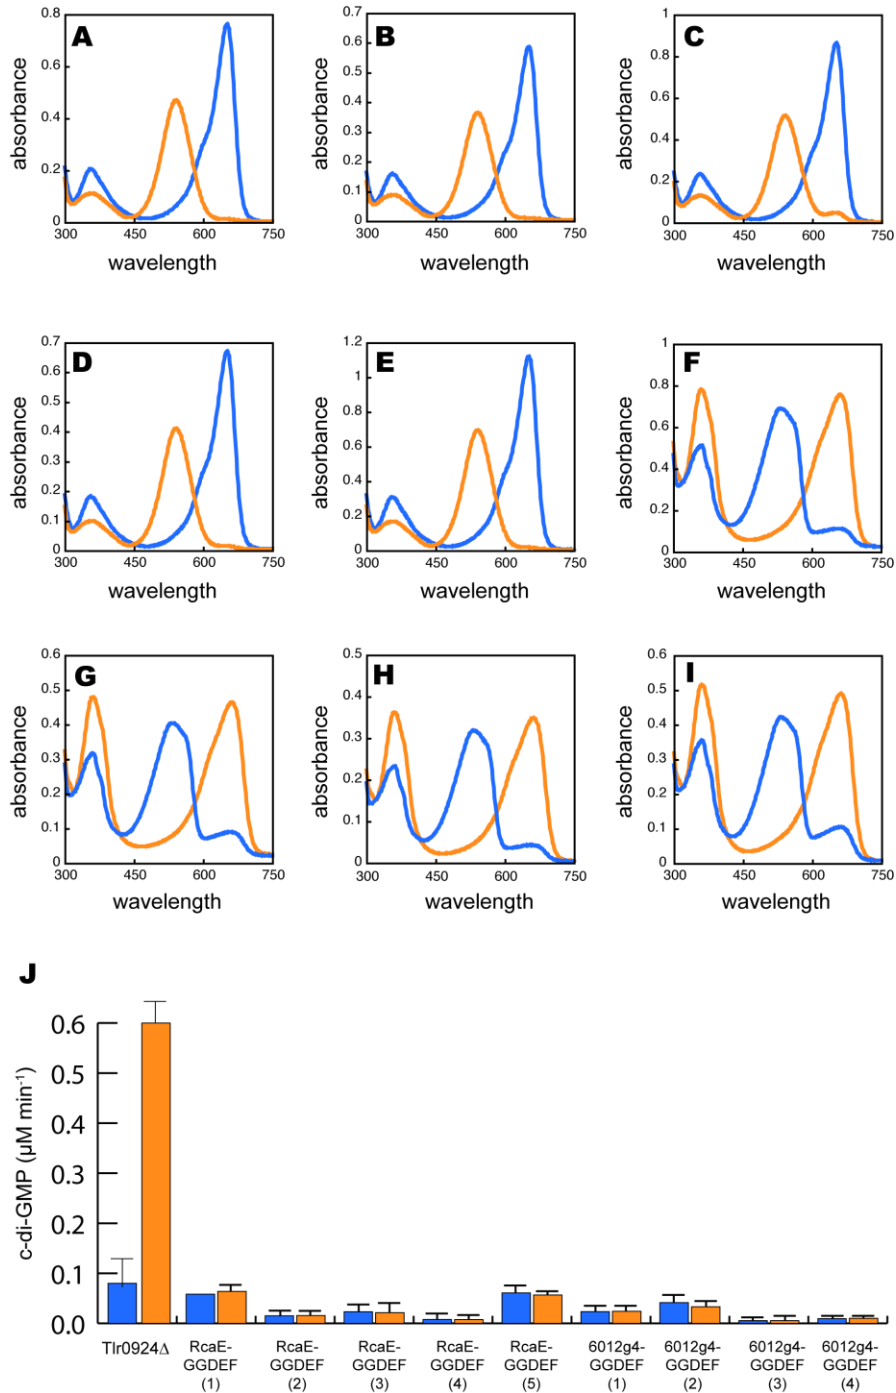

**Supplemental Figure S2. CBCR GAF domain alignment.** Amino acid sequence alignment of CBCR (GAF) domain of CBCR-DGC proteins. Bold lettering indicates proteins examined in this work. Blue highlighting denotes canonical '1<sup>st</sup> cysteine' residue. Yellow highlighting denotes DXCF motif. Red highlighting denotes 2<sup>nd</sup> cysteine residue of Lyn8106\_0097Δ and Lyn.aest\_0230Δ.

```

WP_011378510  ERILLDITLNRQSLNLSQVAVSEVRSLLRVNRLIYQFQDPWRGLIVAESVSEPEFSLMGIQIEDYCFANNWQQYRDGYIHQIDHVAIAGLDDYRRLQSIKVKANLVLPIRYG
KGG71856  QEILFNLVAEIRESLNLDLTKFTTVREIRKALRSRDRVGFQFDLESSEGFVSEVLPDYDSTLATKVKDHCFCGEKYADAYHQGRIQVLSVYKSSGLKDCHLRVLQEQFIKAQIIVPLMKG
WP_015113918  QEILFNLVAEIRESLNLDLTKFTTVREIRKALRADRVGIFRFDTKSSGFEVSENVLPDYDSVIAIKVKDHCFCGKRYTVAYHQGRIQVLSNIYQAGLKDCHLLVLEFQFIKAQIIVPLMKG
Node_0172  QEVLFNLIAEIRESLDLTKFTKTAREVRKALHTDRVGFQFDPDSSGFEVSENLLEPYDSAIAIKVSDHCFCGDKYVEQYQKGIQVLSDVQAGLTDCHLELLENFQIKAQIIVPLMKG
WP_015210266  AILLRDIITQRINQSLDLSNIFEIASQKIRELIHADRVGIFKFFSDADGFEVSEVSLQGFNSHLARKIHDHCFCKQYASYQQGRIQALDDIDNAGLADCHRRLLAKLQIRANLVPVLLNG
WP_010873764  EKLVLKIANKIRASLNINDILYSTVTEVRQFLNTRDVLVFKFNSQWSQGVVTEHNDFCRSIINDEIDDPFCFKGHYLRLYREGRVRAVSDIEKADLADCHKELLRHYQVKANLVPVVFVN
AIE73515  EKLVLKIANKIRASLNINDILHSTVTEVRQFLNTRDVLVFKFNSQWSQGVVTEHNDFCRSIINQEIIDDPFCFKGHYLRLYREGRVRAVSDIEMADLADCHRELLRHYQVKANLVPVVFVN
WP_015855649  ERIMDVAVQKIRASLNLDLINTVSEIRHLLNTRDVFYRFDENWVGVVSEVACPEFSILGEWIDDPFCFRDQYVYKQRGRVRAIKAEIDIAQIELTSPCHRELLRHYQVKANLVPVIVYQ
WP_013231179  ERIFREVAQKICSSHRLDLINTVTEVRHLLSDRVFLYRFNEHVVGTVVVSEVAAPEFSILGESIDDPFCFRDQYVYKQRGRVRAIKAEIDIEQAELALCHRELLRHYQVKANLVPVIVAF
WP_006529598  ERLVMEVAQKIRQSLNLEIIMETVTEVRHLLQADRFLYQFNADWSGTVVSEVSELSILGDLIDDPFCFREYIKHYRQRGRVRAIKAEIDVTKKEELASCHLELLTRHYQVKANLVPVIVHQ
WP_009783799  ERLVMEIVHKIRQSLNLDLTKTADEVRRLNLDTRVILFRFDSQWNGTVVSEVSLTDYPSLDDEIDDPFCFREYIKHYRQRGRVRAIKAEIDVTKKEELASCHLELLTRHYQVKANLVPVIVYQ
WP_038728489  EHLVLEIAEKIRQSLDLGYILETAVTEVRQLGCDRLFLQFDEHWAGTEVTEVSDPVVYSILGEWIDDPFCFRNEVYKLYRQRGRVRAIKAEIDVTKKEELASCHLELLTRHYQVKANLVPVIVYQ
WP_015111021  ERIVAAVTQRIQSLDELDEILQTTAEVRQLFAVDRVVIYQFEPDWSGLVAVESLAPGCSISILGFHVMDDTCFQSTHAAYQQGNTRAEIDVTEAGLSPCHLELLRSLQIRANLVPVILQQ
Npr1060  ERIVAAVTQRIQSLDELDEILQTTAEVRQLFEVDRVVIYQFEPDWSGLVAVESLAECCMSILGFHVMDDTCFKSTRAIYQQGNTRAEIDVTEAGLSPCHLELLRSLQIRANLVPVILQK
WP_017745795  ERIVAAVTQRIQSLDELDEILQTTAEVRQLFEVDRVVIYQFEPDWSGLVAVESLAECCMSILGFHVMDDTCFKSTHAAYQQGNTRAEIDVTEAGLSPCHVLDLRLSLHIRANLVPVILQQ
KGG72295  ERIVAAVTQRIQSLDELDEILQTTAEVRQLFEVDRVVIYQFEPDWSGLVAVESLAECCMSILGFHVMDDTCFQSTHAAYQQGNTRAEIDVTEAGLSPCHVLDLRLSLHIRANLVPVILQQ
WP_016876404  ERVVAAVTQHIRCSLELNEILQTTAEVRQLFEVDRVVIYQFEPDWSGLVAVESLAECCMSILGFHVMDDTCFQSTHAAYQQGNTRAEIDVTEAGLSPCHVLDLRLSLHIRANLVPVILQQ
WP_011317683  ERIVAAVTQRIQSLKLEELQTTAEVRQLFEVDRVVIYRFEPDWSGLVAVESLAECCMSILGFHVIDTCFQSTHAAYQQGNTRAEIDVTEAGLSPCHVLDLRLSLHIRANLVPVILQK
WP_029632327  ERIVAAVTQRIQSLLELNEILQTTAEVRQLFEVDRVVIYQFEPDWSGLVAVESLAECCMSILGFHVMDDTCFQSTHAAYQQGNTRAEIDVTEAGLSPCHVLDLRLSLHIRANLVPVILQQ
WP_035988295  ERIVAAVTQRIQSLDLNEILQTTAEVRQLFEVDRVVIYRFEPDWSGLVAVESLAECCMSILGFHVMDDTCFKTTHAAYQQGNTRAEIDVTEAGLSPCHVLDLRLSLHIRANLVPVILHQ
WP_017320093  ERIVATVTQRIQSLDELDEILQTTAEVRQLFDVDRVVIYRFEPDWSGLVAVESLAPGCSISILGFHVMDDTCFQSNRAAYQQGNTRAEIDVTEAGLSPCHVLDLRLSLHIRANLVPVILQQ
WP_036012702  DRIVAAVTQRIHQSLNLDLTKTATEIRQLFDVDRVVIYRFEPDWSGLVAVESLAECCMSILGFHVMDDTCFQSTHAAYQQGNTRAEIDVTEAGLSPCHVLDLRLSLHIRANLVPVILQQ
Os6304_3201  ERVMSAMRDIRSSLNKLEILNTTVAEVRQLNTRDVIYRFEPDWSGLVAVESLAECCMSILGFHVMDDTCFQSTHAAYQQGNTRAEIDVTEAGLSPCHVLDLRLSLHIRANLVPVILLN
WP_015174564  ERLIAQIQSRIRSSLDLQDILNTTVAEVRFLATDRVILFRFRPDWNGDWSVSEVAGWPIKGMGIDDCFCFANTYIGQYKGRVRAIKAEIDVTEAGLSPCHVLDLRLSLHIRANLVPVILQQ
WP_006633119  ERLIAQIQSRIRSSLDLQDILNTTVAEVRFLATDRVILFRFRPDWNGDWSVSEVAGWPIKGMGIDDCFCFANTYIGQYKGRVRAIKAEIDVTEAGLSPCHVLDLRLSLHIRANLVPVILQQ
YP_007122890  ERLIAQIQSRIRSSLDLQDILNTTVAEVRFLATDRVILFRFRPDWNGDWSVSEVAGWPIKGMGIDDCFCFANTYIGQYKGRVRAIKAEIDVTEAGLSPCHVLDLRLSLHIRANLVPVILQQ
WP_03802070  ERLIGIQAQIRQLHLSLITTTVEEVRQLQVDRVVIYQFEPDWSGLVAVESLAECCMSILGFHVMDDTCFQSTHAAYQQGNTRAEIDVTEAGLSPCHVLDLRLSLHIRANLVPVILQQ
WP_03335474  ERLIGVIAQIRQLHLSLITTTVEEVRQLQVDRVVIYQFEPDWSGLVAVESLAECCMSILGFHVMDDTCFQSTHAAYQQGNTRAEIDVTEAGLSPCHVLDLRLSLHIRANLVPVILQQ
WP_038332578  EKLIGMSQARIRSSLDLITINTTVEEVRNLFQCDRVLVYRMPDWSGTVAESIHFDWPSVMGITIDDPFCFTPLDARRYREGHIHYFDDIESCELSPTHQLLSPLEVKANLVPVILQQ
Shof_0333  QRLAAEITQKIHKSLELDEILQTTAEVRQLQVDRVILFQKSDSGSIVQESVDPAFISTGLQLFLDRCFPSHCYDLYCRGQSQVIFDTRNQLDLSGCKLNFMMQIGVKSKVVTPIQH
KGG76686  QRLAAEITQKIHKSLELDEILQTTAEVRQLQVDRVILFQKSDSGSIVQESVDPAFISTGLQLFLDRCFPSHCYDLYCRGQSQVIFDTRNQLDLSGCKLNFMMQIGVKSKVVTPIQH
Tir0924  EMIVSTIQQIRQSLRLEELQRAVNSIQQLLSDRVLVYRFQDWSGIVAVEAATLPQYSILGQVVIDDPFCFKTETARRFLGRTLSISDVNQAQLQDCYRELLTRLQVQANLVPVILQQ
WP_024125851  EMIVSTIQQIRQSLRLEELQRAVNSIQQLLSDRVLVYRFQDWSGIVAVEAATLPQYSILGQVVIDDPFCFKTETARRFLGRTLSISDVNQAQLQDCYRELLTRLQVQANLVPVILQQ
WP_015123238  ELLISTISQNIIRSLDLTQVMQSAADVQRILQTDRLVFLRPLNGLGVVEVESLAHPQESILGRFIQDPCFLDNLSRKLTSYGTATISDSHQAHLPHCHRELLNLRANLVPVILHN
WP_015202462  EQLIGIQAQIRQLGCLSDLITQTADEVRNLFVNERVITQYIEPEKNGKVVSEVTPSISPIVGLHLHDPFCFRNRYLDYQNGRVSAINDIWATLHPCYQNFKRLGIRANLVPVILVAN
ERLMAARMLEIRYSLNLDVILNTTVAEVRQLQTDRLVILYRFYDPTKGMVMVESVFPWVSLGTLLENYCFSEDAEYKQGRVHTIEDIYATDLSECHKNFLDRQVRAVSMVVPVIR
WP_006623497  QRLLMLVITQRIRRSKLDKILQTTVQVREFLNTRDVIYRFHDDGNGVMVFEVSPGWKSVVGTIVTEDCWTPHYLAGFSGQVQAMADLSTQDTRSDIIRLSEFQVQANLVPVILTR
KDR55793  QRLLMLVITQRIRRSKLDKILQTTVQVREFLNTRDVIYRFHDDGNGVMVFEVSPGWKSVVGTIVTEDCWTPHYLAGFSGQVQAMADLSTQDTRSDIIRLSEFQVQANLVPVILTR
WP_015179608  AILLQEIITQIRQSLDLSTIFEIASQKIRVFLDAERVGIFKFFDPSYGEVSEVSEVAGCKLVRNQFNDCSCGGEQDPSYQAGIQQVVEDINKIDQLCHYRAIWKKFPVRANLVPVLLNG
WP_006632122  AILLQEIITQIRQSLDLSTIFEIASQKIRVFLDAERVGIFKFFDPSYGEVSEVSEVAGCKLVRNQFNDCSCGGEQDPSYQAGIQQVVEDINKIDQLCHYRAIWKKFPVRANLVPVLLNG
EKLNSIATRIRQSLDELDAIKISIKEMRQFLHIDRLLIYRFKPDWSGVVTEVSPWRSLGRILLDEEFIAHYLPKYKTRGTHLIPDENSELSPCHIQWLTLEQVKANLVPVIVQ
WP_012594761  EQTLVNAIAQRIRRSLEIEAILETTVQEVQNLCCDRAFLYRFDWDSGTVVVEALRSPDYLGLRRLDTEFIANVYLYKQGRVHVVDVQVSNLSEYINWLTLDQVRANLVPVILHD
WP_033374512  ERMSAISIAQIRQSLDLDEILNTTVAEVRQLKTDRLVILYRFNPDWSGVVTEVSAKQCAILNMEIETEVFVETQAFYQQNTVKATSDIYTAGLTPCHLELLRSLQIRANLVPVILQQ
AGZ5265  ERMIYITQRIQSLDLDEILQTTAEVRQLQTDRLVILYRFNPDWSGVVTEVSAKQCAILNMEIETEVFVETQAFYQQNTVKATSDIYTAGLTPCHLELLRSLQIRANLVPVILQQ
WP_036834157  ERLIYITQRIQSLDLDEILQTTAEVRQLQTDRLVILYRFNPDWSGVVTEVSAKQCAILNMEIETEVFVETQAFYQQNTVKATSDIYTAGLTPCHLELLRSLQIRANLVPVILQQ
WP_012599180  ERMHMDITRIRQSLDLDEILNTTVDVQRFLQTDRLVILYRNLNPDWSGIVVTEVSPWKWIAILNMEIETEVFVETEGGYHRGYNINNVPIYTAGFSPCHLELLRSLQIRANLVPVILQQ
Cyan7822_5462  ERMIHEIAHKIRQSLDLTEILNTTVAQVRFLQTDRLVILYRNLNPDWSGIVVTEVSPWKWIAILNMEIETEVFVETEGGYHRGYNINNVPIYTAGFSPCHLELLRSLQIRANLVPVILQQ
WP_015079859  EQLIAKIQKIRQSLNLEILSTTAIEVRKLLKTRDVIYRFHDDGNGVMVFEVSAEAWDSMLGRVFDQYFSDQCGYDYRQSNIVYIEDIDNAGLSQCHIDLSQLQAKANLVPVILQEE
WP_015148692  ERLVSRTLARIRQSLNLEILNTAVSEVRQLDCCRDRVYVYRIPWDSGSGVTEVSPWMMEQSFGEEIFPFCYERYCNGTVKAIIDDLKAANSPLCEFLQSLFGVNGKMIAPLHE
WP_035988320  EQTLWQITQKIRQLDLPISILATATAEVQSYLQVDRVILFQFSDHSGAIIQTTAQASCTPTAQEQWADGLRQRCYHYYSQGOAKAIAGLTADLNECLSPMIELTEAKSAIVAPILQP
EHALRMIITQIRRESLDLAPILAAVVEVQQLQADRTLIFQLTSAHSGIVVQEQSRTFPTILAMQWEDHFSNPNYAFYQQAQRVIVQDITQDDWGDCLIFEMQSIGVQSKMVPITQT
WP_008308234  EAVLTTVTNTIQTEDIQSLDAAVLTLHFFQADRVLVYQITDQQRGIVVEVAGDWPMSQDVTIDEPCLGEQRQYARRGKQVQAIADIDAVPLASCYRELLRQYVRANLVPVIVQE
Lyn.aest_0230  EKLAAEINDRIRQSLDELQILVAVTEVQELIQAADRVLVYRFNPDWSGIIITVESVPGFSDSLDKSIFDSYLLQTRGEAFRQNIQVNDIYANTLPCHQELLTQIRASLLELIVNS
Lyn8106_0097  EKLAAEINDRIRQSLDELQILVAVTEVQELIQAADRVLVYRFNPDWSGIIITVESVPGFSDSLDKSIFDSYLLQTRGEAFRQNIQVNDIYANTLPCHQELLTQIRASLLELIVNS
WP_038729794  ERLIDEIAQIRQLDLDAIINTAVTEVREFLDVRVLYRFNPDWSGIIITVESVPGFSDSLDKSIFDSYLLQTRGEAFRQNIQVNDIYANTLPCHQELLTQIRASLLELIVNS
WP_038725076  ERLIDTISQRIYECTELDEILDTTVAQVRLFLTRDRLVLYRFKPDWSGTVAVESVSPGMPILYTHIEESCFRDGYISLYEQGRVRAIKAEIDVTEAGLSPCHLELLRSLQIRANLVPVILQQ

```

**Supplemental Figure S3. DGC GGDEF domain alignment.** Amino acid sequence alignment of GGDEF domain of CBCR-DGC proteins. Bold lettering indicates proteins examined in this work. Blue highlighting denotes RxxD inhibition site motif. Yellow highlighting denotes 'GGDEF' DGC active site motif.

Lyn\_aest\_0230 DGLTQIANRRYFDEYFEQEWHR LKREQAPLSLILCDVDYFKYNDYVYHGLAGDCLQVQAEASRGRVPAADLVARYGGEEFVVL PNTNMEGAVVRRICQNEIQALNIPHSTNQITLS  
Lyn8106\_0097 DGLTQIANRRYFDEYFEQEWHR LKREQAPLSLILCDVDYFKYNDYVYHGLAGDCLQVQAEASRGRVPAADLVARYGGEEFVVL PNTNMEGAVVRRICQNEIQALNIPHSTNQITLS  
WP\_0308262070 DGLTQIANRRSFDEFLDR EWQR SKREQSP LSL LDCIDHFKLYNDYVYHQAAGDCLQVQAEASRGRVPAADLVARYGGEEFVVL PNTDGTMGAIQVIEQIQQAVALQIPIHRSVCVTVS  
WP\_033335474 DGLTQIANRRSFDEFLDR EWQR SKREQSP LSL LDCIDHFKLYNDYVYHQAAGDCLQVQAEASRGRVPAADLVARYGGEEFVVL PNTDGTMGAIQVIEQIQQAVALQIPIHRSVCVTVS  
WP\_015210266 DGLTQIANRRCFNDR LQEWLR LCR EQP LSL LDFVDYFKRYNDYVYHGLGDCLTKLQAQAQVVRPAADLVARYGGEEFVVL PNTDAEGAGAVAEVHMAQALNIPHQASVTVTIS  
WP\_015179608 DGLTQIANRRCFNDR LQEWLR LCR EQP LSL LDFVDYFKRYNDYVYHGLGDCLTKLQAQAQVVRPAADLVARYGGEEFVVL PNTDAEGAGAVAEVHMAQALNIPHQASVTVTIS  
WP\_006632122 DGLTQIANRRCFNDR LQEWLR LCR EQP LSL LDFVDYFKRYNDYVYHGLGDCLTKLQAQAQVVRPAADLVARYGGEEFVVL PNTDAEGAGAVAEVHMAQALNIPHQASVTVTIS  
AGZ05265 DGLTQIANRRCFNDR LQEWLR LCR EQP LSL LDFVDYFKRYNDYVYHGLGDCLTKLQAQAQVVRPAADLVARYGGEEFVVL PNTDAEGAGAVAEVHMAQALNIPHQASVTVTIS  
WP\_012599180 DGLTQIANRRCFDHLERHWQNLARQKRLPSL LDCIDYFKYNDYVYHGGDCLTVQAALKASASD LVARYGGEEFVVL PNTDNFGAIVAQAQVIRKLELRPHRASVYVTVS  
Cyan7822\_5462 DGLTQIANRRCFDHLERHWQNLARQKRLPSL LDCIDYFKYNDYVYHGGDCLTVQAALKASASD LVARYGGEEFVVL PNTDNFGAIVAQAQVIRKLELRPHRASVYVTVS  
WP\_036834157 DGLTQIANRRCFDHLERHWQNLARQKRLPSL LDCIDYFKYNDYVYHGGDCLTVQAALKASASD LVARYGGEEFVVL PNTDNFGAIVAQAQVIRKLELRPHRASVYVTVS  
YP\_007122690 DGLTQIANRRCFDHLERHWQNLARQKRLPSL LDCIDYFKYNDYVYHGGDCLTVQAALKASASD LVARYGGEEFVVL PNTDNFGAIVAQAQVIRKLELRPHRASVYVTVS  
WP\_015955649 DGLTQIANRRCFDHLERHWQNLARQKRLPSL LDCIDYFKYNDYVYHGGDCLTVQAALKASASD LVARYGGEEFVVL PNTDNFGAIVAQAQVIRKLELRPHRASVYVTVS  
WP\_013321179 DGLTQIANRRCFDHLERHWQNLARQKRLPSL LDCIDYFKYNDYVYHGGDCLTVQAALKASASD LVARYGGEEFVVL PNTDNFGAIVAQAQVIRKLELRPHRASVYVTVS  
WP\_009783799 DGLTQIANRRCFDHLERHWQNLARQKRLPSL LDCIDYFKYNDYVYHGGDCLTVQAALKASASD LVARYGGEEFVVL PNTDNFGAIVAQAQVIRKLELRPHRASVYVTVS  
WP\_012594761 DGLTQIANRRCFDHLERHWQNLARQKRLPSL LDCIDYFKYNDYVYHGGDCLTVQAALKASASD LVARYGGEEFVVL PNTDNFGAIVAQAQVIRKLELRPHRASVYVTVS  
WP\_038332578 DGLTQIANRRCFDHLERHWQNLARQKRLPSL LDCIDYFKYNDYVYHGGDCLTVQAALKASASD LVARYGGEEFVVL PNTDNFGAIVAQAQVIRKLELRPHRASVYVTVS  
WP\_006529598 DGLTQIANRRCFDHLERHWQNLARQKRLPSL LDCIDYFKYNDYVYHGGDCLTVQAALKASASD LVARYGGEEFVVL PNTDNFGAIVAQAQVIRKLELRPHRASVYVTVS  
WP\_039728489 DGLTQIANRRCFDHLERHWQNLARQKRLPSL LDCIDYFKYNDYVYHGGDCLTVQAALKASASD LVARYGGEEFVVL PNTDNFGAIVAQAQVIRKLELRPHRASVYVTVS  
WP\_015111021 DGLTQIANRRCFDHLERHWQNLARQKRLPSL LDCIDYFKYNDYVYHGGDCLTVQAALKASASD LVARYGGEEFVVL PNTDNFGAIVAQAQVIRKLELRPHRASVYVTVS  
KGG72295 DGLTQIANRRCFDHLERHWQNLARQKRLPSL LDCIDYFKYNDYVYHGGDCLTVQAALKASASD LVARYGGEEFVVL PNTDNFGAIVAQAQVIRKLELRPHRASVYVTVS  
WP\_016876404 DGLTQIANRRCFDHLERHWQNLARQKRLPSL LDCIDYFKYNDYVYHGGDCLTVQAALKASASD LVARYGGEEFVVL PNTDNFGAIVAQAQVIRKLELRPHRASVYVTVS  
WP\_017320093 DGLTQIANRRCFDHLERHWQNLARQKRLPSL LDCIDYFKYNDYVYHGGDCLTVQAALKASASD LVARYGGEEFVVL PNTDNFGAIVAQAQVIRKLELRPHRASVYVTVS  
WP\_015148692 DGLTQIANRRCFDHLERHWQNLARQKRLPSL LDCIDYFKYNDYVYHGGDCLTVQAALKASASD LVARYGGEEFVVL PNTDNFGAIVAQAQVIRKLELRPHRASVYVTVS  
WP\_015202462 DGLTQIANRRCFDHLERHWQNLARQKRLPSL LDCIDYFKYNDYVYHGGDCLTVQAALKASASD LVARYGGEEFVVL PNTDNFGAIVAQAQVIRKLELRPHRASVYVTVS  
WP\_006923497 DGLTQIANRRCFDHLERHWQNLARQKRLPSL LDCIDYFKYNDYVYHGGDCLTVQAALKASASD LVARYGGEEFVVL PNTDNFGAIVAQAQVIRKLELRPHRASVYVTVS  
KDR55793 DGLTQIANRRCFDHLERHWQNLARQKRLPSL LDCIDYFKYNDYVYHGGDCLTVQAALKASASD LVARYGGEEFVVL PNTDNFGAIVAQAQVIRKLELRPHRASVYVTVS  
WP\_015079858 DGLTQIANRRCFDHLERHWQNLARQKRLPSL LDCIDYFKYNDYVYHGGDCLTVQAALKASASD LVARYGGEEFVVL PNTDNFGAIVAQAQVIRKLELRPHRASVYVTVS  
WP\_008308234 DGLTQIANRRCFDHLERHWQNLARQKRLPSL LDCIDYFKYNDYVYHGGDCLTVQAALKASASD LVARYGGEEFVVL PNTDNFGAIVAQAQVIRKLELRPHRASVYVTVS  
KGG71856 DGLTQIANRRCFDHLERHWQNLARQKRLPSL LDCIDYFKYNDYVYHGGDCLTVQAALKASASD LVARYGGEEFVVL PNTDNFGAIVAQAQVIRKLELRPHRASVYVTVS  
WP\_015113918 DGLTQIANRRCFDHLERHWQNLARQKRLPSL LDCIDYFKYNDYVYHGGDCLTVQAALKASASD LVARYGGEEFVVL PNTDNFGAIVAQAQVIRKLELRPHRASVYVTVS  
Nodo\_0172 DGLTQIANRRCFDHLERHWQNLARQKRLPSL LDCIDYFKYNDYVYHGGDCLTVQAALKASASD LVARYGGEEFVVL PNTDNFGAIVAQAQVIRKLELRPHRASVYVTVS  
WP\_03374512 DGLTQIANRRCFDHLERHWQNLARQKRLPSL LDCIDYFKYNDYVYHGGDCLTVQAALKASASD LVARYGGEEFVVL PNTDNFGAIVAQAQVIRKLELRPHRASVYVTVS  
WP\_039730111 DGLTQIANRRCFDHLERHWQNLARQKRLPSL LDCIDYFKYNDYVYHGGDCLTVQAALKASASD LVARYGGEEFVVL PNTDNFGAIVAQAQVIRKLELRPHRASVYVTVS  
WP\_035989320 DGLTQIANRRCFDHLERHWQNLARQKRLPSL LDCIDYFKYNDYVYHGGDCLTVQAALKASASD LVARYGGEEFVVL PNTDNFGAIVAQAQVIRKLELRPHRASVYVTVS  
Ti0924 DGLTQIANRRCFDHLERHWQNLARQKRLPSL LDCIDYFKYNDYVYHGGDCLTVQAALKASASD LVARYGGEEFVVL PNTDNFGAIVAQAQVIRKLELRPHRASVYVTVS  
WP\_024125851 DGLTQIANRRCFDHLERHWQNLARQKRLPSL LDCIDYFKYNDYVYHGGDCLTVQAALKASASD LVARYGGEEFVVL PNTDNFGAIVAQAQVIRKLELRPHRASVYVTVS  
WP\_015123238 DGLTQIANRRCFDHLERHWQNLARQKRLPSL LDCIDYFKYNDYVYHGGDCLTVQAALKASASD LVARYGGEEFVVL PNTDNFGAIVAQAQVIRKLELRPHRASVYVTVS  
WP\_010873764 DGLTQIANRRCFDHLERHWQNLARQKRLPSL LDCIDYFKYNDYVYHGGDCLTVQAALKASASD LVARYGGEEFVVL PNTDNFGAIVAQAQVIRKLELRPHRASVYVTVS  
AIE73515 DGLTQIANRRCFDHLERHWQNLARQKRLPSL LDCIDYFKYNDYVYHGGDCLTVQAALKASASD LVARYGGEEFVVL PNTDNFGAIVAQAQVIRKLELRPHRASVYVTVS  
WP\_039729794 DGLTQIANRRCFDHLERHWQNLARQKRLPSL LDCIDYFKYNDYVYHGGDCLTVQAALKASASD LVARYGGEEFVVL PNTDNFGAIVAQAQVIRKLELRPHRASVYVTVS  
WP\_039725076 DGLTQIANRRCFDHLERHWQNLARQKRLPSL LDCIDYFKYNDYVYHGGDCLTVQAALKASASD LVARYGGEEFVVL PNTDNFGAIVAQAQVIRKLELRPHRASVYVTVS  
WP\_011378610 DGLTQIANRRCFDHLERHWQNLARQKRLPSL LDCIDYFKYNDYVYHGGDCLTVQAALKASASD LVARYGGEEFVVL PNTDNFGAIVAQAQVIRKLELRPHRASVYVTVS  
WP\_017745795 DGLTQIANRRCFDHLERHWQNLARQKRLPSL LDCIDYFKYNDYVYHGGDCLTVQAALKASASD LVARYGGEEFVVL PNTDNFGAIVAQAQVIRKLELRPHRASVYVTVS  
WP\_029632327 DGLTQIANRRCFDHLERHWQNLARQKRLPSL LDCIDYFKYNDYVYHGGDCLTVQAALKASASD LVARYGGEEFVVL PNTDNFGAIVAQAQVIRKLELRPHRASVYVTVS  
NgR1060 DGLTQIANRRCFDHLERHWQNLARQKRLPSL LDCIDYFKYNDYVYHGGDCLTVQAALKASASD LVARYGGEEFVVL PNTDNFGAIVAQAQVIRKLELRPHRASVYVTVS  
WP\_011317883 DGLTQIANRRCFDHLERHWQNLARQKRLPSL LDCIDYFKYNDYVYHGGDCLTVQAALKASASD LVARYGGEEFVVL PNTDNFGAIVAQAQVIRKLELRPHRASVYVTVS  
WP\_036012702 DGLTQIANRRCFDHLERHWQNLARQKRLPSL LDCIDYFKYNDYVYHGGDCLTVQAALKASASD LVARYGGEEFVVL PNTDNFGAIVAQAQVIRKLELRPHRASVYVTVS  
WP\_035988295 DGLTQIANRRCFDHLERHWQNLARQKRLPSL LDCIDYFKYNDYVYHGGDCLTVQAALKASASD LVARYGGEEFVVL PNTDNFGAIVAQAQVIRKLELRPHRASVYVTVS  
DALTHVANRRRFDHYLQEQWRRLTRERKPLSL LDCIDYFKYNDYVYHGGDCLTVQAALKASASD LVARYGGEEFVVL PNTDNFGAIVAQAQVIRKLELRPHRASVYVTVS  
S.hof\_0333 DALTHVANRRRFDHYLQEQWRRLTRERKPLSL LDCIDYFKYNDYVYHGGDCLTVQAALKASASD LVARYGGEEFVVL PNTDNFGAIVAQAQVIRKLELRPHRASVYVTVS  
KGG76686 DALTHVANRRRFDHYLQEQWRRLTRERKPLSL LDCIDYFKYNDYVYHGGDCLTVQAALKASASD LVARYGGEEFVVL PNTDNFGAIVAQAQVIRKLELRPHRASVYVTVS  
WP\_007356015 DALTHVANRRRFDHYLQEQWRRLTRERKPLSL LDCIDYFKYNDYVYHGGDCLTVQAALKASASD LVARYGGEEFVVL PNTDNFGAIVAQAQVIRKLELRPHRASVYVTVS  
WP\_015174564 DALTHVANRRRFDHYLQEQWRRLTRERKPLSL LDCIDYFKYNDYVYHGGDCLTVQAALKASASD LVARYGGEEFVVL PNTDNFGAIVAQAQVIRKLELRPHRASVYVTVS  
WP\_006633119 DALTHVANRRRFDHYLQEQWRRLTRERKPLSL LDCIDYFKYNDYVYHGGDCLTVQAALKASASD LVARYGGEEFVVL PNTDNFGAIVAQAQVIRKLELRPHRASVYVTVS  
O6s304\_3201 DGLTQIANRRCFDHLERHWQNLARQKRLPSL LDCIDYFKYNDYVYHGGDCLTVQAALKASASD LVARYGGEEFVVL PNTDNFGAIVAQAQVIRKLELRPHRASVYVTVS

**Supplemental Figure S4. CBCR-DGC linker alignment.** Amino acid sequence alignment of linker region between CBCR and GGDEF domains. Bold lettering indicates proteins further discussed in this work. Blue highlighting denotes conserved leucine residue discussed in previous work (Blain-Hartung et al., 2017). Red highlighting denotes conserved polar, hydrophilic residue discussed in text. Yellow highlighting denotes residues that are conserved in  $\geq 90\%$  of observed proteins.

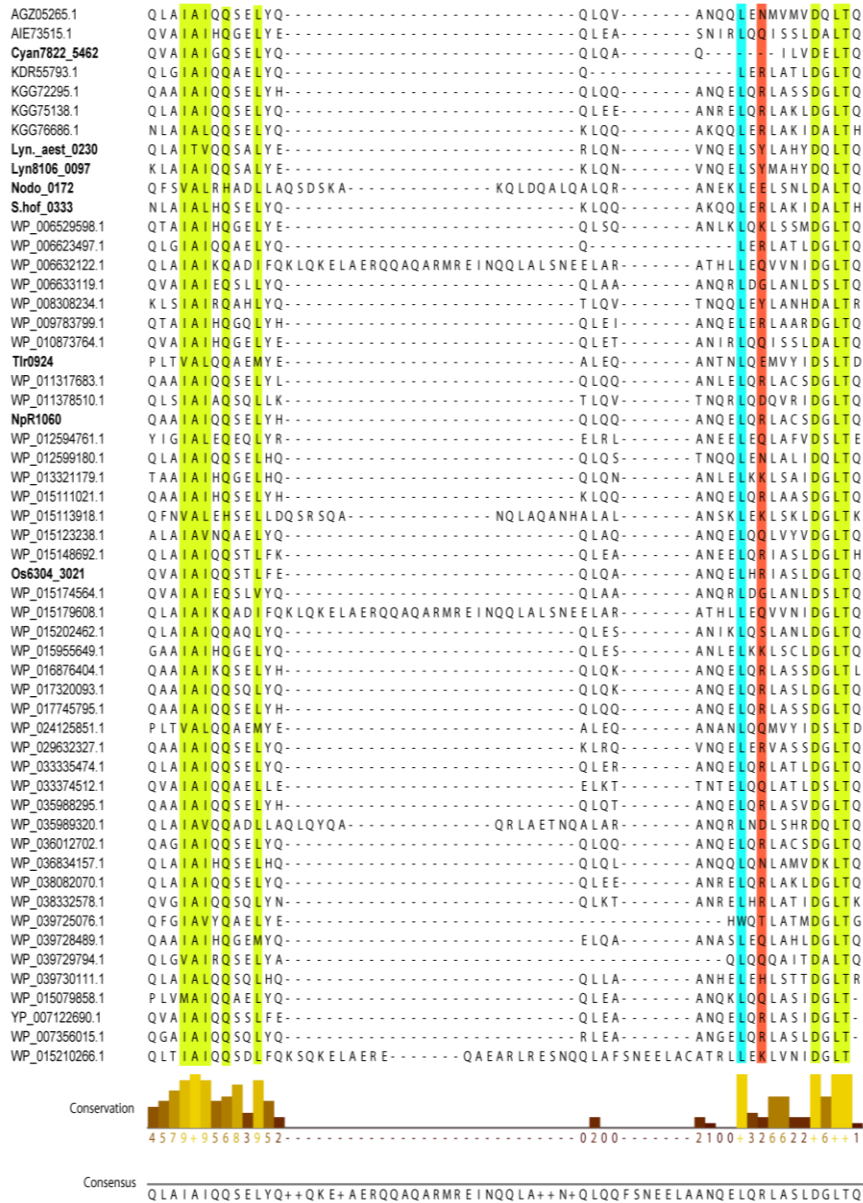

**Supplemental Figure S5. Spectroscopic characterization of 2<sup>nd</sup> cysteine mutant constructs of novel R/B CBCR proteins and the GAF1-only construct, Nod\_0172(GAF1).** (A) Lyn.aest\_0230 $\Delta$ (C73A), (B) Lyn8106\_0097 $\Delta$ (C53A), (C) Nod\_0172(GAF1). 15Z, blue traces; 15E, orange traces.

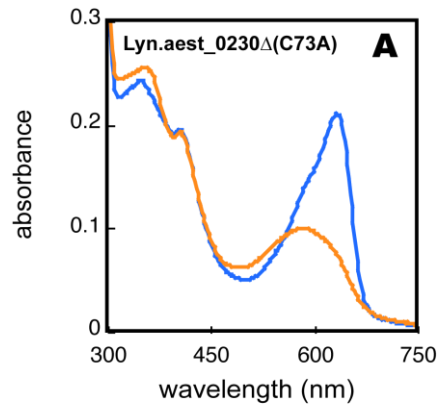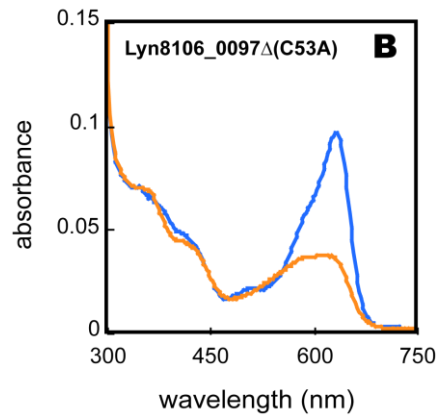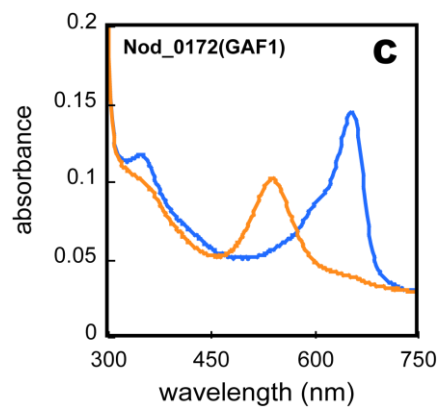

**Supplemental Table S1: Accession information for proteins in this study<sup>1</sup>**

| Protein       | Genbank accession | DOE-IMG locus tag   | Organism                                             |
|---------------|-------------------|---------------------|------------------------------------------------------|
| Os6304_3021   | AFY82617          | Oscil6304_3021      | <i>Oscillatoria acuminata</i><br>PCC 6304            |
| S.hof_0333    | KYC42878          | WA1DRAFT_10042      | <i>Scytonema hofmannii</i><br>PCC 7110               |
| NpR1060       | ACC79786          | Npun_R1060          | <i>Nostoc punctiforme</i> PCC<br>73102               |
| Lyn8106_0097  | EAW38947          | L8106_01492         | <i>Lyngbya</i> sp. PCC 8106                          |
| Lyn.aest_0230 | ERT07933          | M595_2050           | <i>Lyngbya aestuarii</i> BL J                        |
| Cyan7822_5462 | ADN17337          | Cyan7822_5462       | <i>Gloeotheca verrucosa</i><br>PCC 7822 <sup>2</sup> |
| Nod_0172      | WP_155523487      | Lepto7104DRAFT_1266 | <i>Nodosilinea nodulosa</i><br>PCC 7104              |

1. Current Genbank accessions, DOE-IMG locus tags, and current organism/strain designations are provided for each newly characterized protein in this study (Fig. 3).

2. *Gloeotheca verrucosa* PCC 7822 is also known as *Cyanothece* sp. PCC 7822.

\*\*\*\*\*

**Supplemental Citation**

Blain-Hartung MD, Rockwell NC, Lagarias JC (2017) Light-regulated synthesis of cyclic-di-GMP by a bidomain construct of the cyanobacteriochrome Tlr0924 (SesA) without stable dimerization. *Biochemistry* 56: 6145-6154.
